# Supplementary material for: Relationship between anaerobic capacity estimated using a single effort and 30-s tethered running outcomes
Source: PLoS One. 2017 Feb 9;12(2):e0172032. doi: 10.1371/journal.pone.0172032 (PMC5300245; doi:10.1371/journal.pone.0172032)
Supplement: S1 Dataset — (XLSX) [file pone.0172032.s001.xlsx]

## Sheet: Supra and 30-s test
	SUBJECTS	FORCE (N)							VELOCITY (m/s)							POWER (W)							DISTANCE (m)
		0-5s	5-10s	10-15s	15-20s	20-25s	25-30s		0-5s	5-10s	10-15s	15-20s	20-25s	25-30s		0-5s	5-10s	10-15s	15-20s	20-25s	25-30s		0-5s	5-10s	10-15s	15-20s	20-25s	25-30s
	1	139.6	128.3	122.4	116.1	110.2	112.5		4.7	5.1	4.9	4.6	4	3.4		656	661	608	538	449	390		23.5	25.4	24.7	23	20.2	17.3
	2	125.7	104.6	104.4	103.1	102.5	99		3.1	4.3	4.4	4.5	4.6	4.5		377	452	461	464	470	445		15.4	21.6	21.8	22.6	22.8	22.6
	3	129.7	101.3	98.9	96.8	94	94.3		3.8	4.8	4.8	4.5	4.2	4		467	492	479	439	399	384		19	24	24	22.6	21.1	20.2
	4	144.3	114.6	108.7	108.7	104.7	103.2		4.1	5	4.9	4.8	4.6	4.3		562	581	536	521	482	450		20.4	25.2	24.5	23.8	23	21.6
	5	153	117.1	111.8	108.7	106.7	99.8		4.3	5.3	5	4.7	4	3.8		622	626	560	510	431	379		21.4	26.6	25	23.5	19.9	19
	6	144.1	112.5	110	102.2	99.2	93.9		3.7	5.1	4.8	4.5	4.1	3.5		518	579	536	464	409	329		18.5	25.4	24.2	22.3	20.4	17.3
	7	143.9	120.4	112.5	107.3	103.6	102.6		3.9	5.1	5	4.8	4.4	4		545	617	568	517	457	415		19.2	25.7	25	23.8	21.8	19.9
	8	148.1	109.4	110.7	106.4	102.1	100.4		4.5	5.4	5.3	5.1	4.8	4.4		628	591	586	541	486	439		22.6	27.1	26.4	25.2	24	21.8
	9	142	112.8	110.4	103.8	102.6	97.8		3.9	5.5	5.4	5.3	5	4.5		533	623	605	553	516	441		19.2	27.6	27.1	26.6	25	22.6
	10	147.5	119.6	116.9	116	112.4	111.3		4.1	4.8	4.8	4.6	4.4	4.1		569	571	563	541	500	455		20.4	23.8	24	23	22.3	20.4
	11	142	115.1	113.7	103.9	108.4	103.1		3.6	4.6	4.7	4.6	4.5	4.3		487	529	535	475	488	448		18	22.8	23.5	22.6	22.6	21.4
	12	133.6	98.3	96	90.3	88.8	87.4		4.7	5.1	4.7	4.3	3.9	3.6		589	504	455	390	346	317		23.3	25.7	23.8	21.4	19.4	18.2
	13	138.8	101.9	95.4	95.8	96.2	95		3.8	4.6	3.7	3.6	3.5	3.5		507	466	354	348	342	331		19	22.8	18.7	18.2	17.5	17.5
	14	133.2	104.3	101.8	99.5	98.1	95.2		3.6	4.6	4.6	4.4	4.2	4		462	479	470	441	412	384		18.2	22.8	22.8	22.1	20.9	19.9
SUBJECTS	SUPRAMAXIMAL EFFORT
	tlim	RPE		[La]baseline	[La]peak	delta[La]	E[La] (ml/kg)	E[La] (L)	EPCr (mL/kg)	EPCr (L)	MAODALT (L)	MAODALT (mL/kg)
1	173	20	107.67	1.6	14.01	12.41	37.23	3.25	21.04	1.84	5.09	58.27
2	115	18	90.39	1.62	15.06	13.44	40.32	2.74	23.68	1.61	4.35	64
3	109	19	70.2	0.79	11.89	11.1	33.3	2.18	17.33	1.13	3.31	50.63
4	146	20	108.49	2.14	14.07	11.93	35.79	2.48	20.39	1.41	3.89	56.18
5	89	18	49.43	2.02	10.63	8.61	25.83	2.25	18.21	1.59	3.84	44.04
6	107	20	64.5	0.66	11.12	10.46	31.38	2.2	19.9	1.4	3.59	51.28
7	124	20	86.52	1.02	13.61	12.59	37.77	3.07	23.47	1.91	4.99	61.24
8	143	17	99.64	0.82	11	10.18	30.54	2.22	23.9	1.73	3.95	54.44
9	91	18	55.51	0.99	10.79	9.8	29.4	2.13	19.29	1.4	3.52	48.69
10	104	18	66.49	1.91	12.32	10.41	31.23	2.63	25.35	2.13	4.76	56.58
11	84	20	46.41	1.09	9.96	8.87	26.61	2.13	18.7	1.5	3.63	45.31
12	64	19	33.68	1.31	8.12	6.81	20.43	1.35	19.78	1.3	2.65	40.21
13	111	19	70.43	1.66	10.61	8.95	26.85	1.88	23.92	1.67	3.55	50.77
14	73	15	40.77	1.27	9.32	8.05	24.15	1.61	22.08	1.47	3.09	46.23

## Sheet: VO2max and other
SUBJECTS	Age (yrs)	Height (cm)	Body weigth (kg)	Free Fat mass (kg)	Fat mass (kg)	VO2max (ml/kg/min)	iVO2max (km/h)
1	29	183	87.4	67.6	17.1	51.39	15.5
2	29	181	68	56.8	11.1	64.18	17.6
3	38	165	65.35	51.3	15.8	53.03	15.5
4	32	179	69.2	55.4	14	64.23	18.5
5	33	181	87.2	64.1	21.8	49.74	17
6	26	177	70.1	51.2	21.5	53.98	15.5
7	28	175	81.4	60.7	20.4	55.27	16.4
8	23	175	72.6	56.4	15.7	59.67	15.5
9	29	178	72.4	62	9.7	56.55	17.6
10	33	188	84.1	69.7	11.1	53.43	17
11	26	176	80.1	61.6	17.9	51.75	17
12	32	166	65.9	51	17	55.6	17
13	29	179	69.95	56	14.4	53.34	16.4
14	25	175	66.8	50.6	19.1	51.38	15.5
